# Supplementary material for: A label-free fluorescent aptasensor based on HCR and G-quadruplex DNAzymes for the detection of prostate-specific antigen
Source: Royal Society of Chemistry journal article supplement (doi:10.1039/d0an02188a), 2020-12-11
Supplement: d0an02188a1.pdf [file d0an02188a1.pdf]

## **A label-free fluorescence aptasensor based on HCR and G-quadruplex DNAzyme for the detection of prostate-specific antigen**

Ruirui Zhao<sup>a,b</sup>, Lu Zhao<sup>b</sup>, Haidi Feng<sup>b</sup>, Xiaoliang Chen<sup>b</sup>, Huilin Zhang<sup>a</sup>, Yunfeng Bai<sup>\*b</sup>, Feng Feng<sup>\*b</sup>, Shaomin Shuang<sup>\*a</sup>

<sup>a</sup>. College of Chemistry and Chemical Engineering, Institute of Environmental Science, Shanxi University, Taiyuan, 030006, China

<sup>b</sup>. College of Chemistry and Environmental Engineering, Shanxi Datong University, Datong, 037009, China

E-mail: [baiyunfeng1130@126.com](mailto:baiyunfeng1130@126.com) (Y. Bai)

E-mail: [feng-feng64@263.net](mailto:feng-feng64@263.net) (F. Feng)

E-mail: [smshuang@sxu.edu.cn](mailto:smshuang@sxu.edu.cn) (S. Shuang)

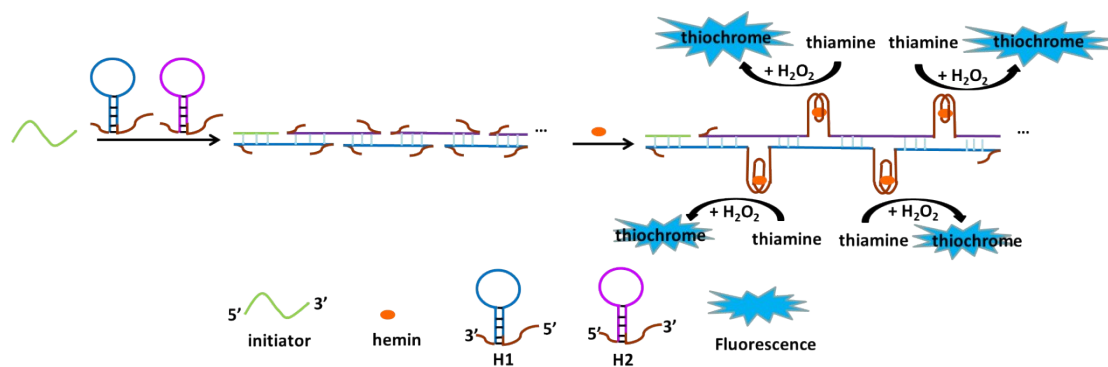

**Figure S1.** Scheme for the formation of the hemin/G-quadruplex DNAzyme triggered by the initiator.

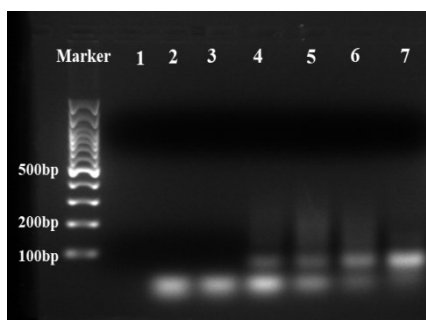

**Figure S2.** Agarose gel electrophoresis verification of the cascaded quadratic amplification process induced by the initiator. Lane 1: 0.5 μM initiator, Lane 2: 0.5 μM H1, Lane 3: 0.5 μM H2, Lane 4: 0.5 μM H1 + 0.5 μM H2, Lane 5: 0.25 μM initiator + 0.5 μM H1 + 0.5 μM H2, Lane 6: 0.5 μM initiator + 0.5 μM H1 + 0.5 μM H2, Lane 7: 1 μM initiator + 0.5 μM H1 + 0.5 μM H2.

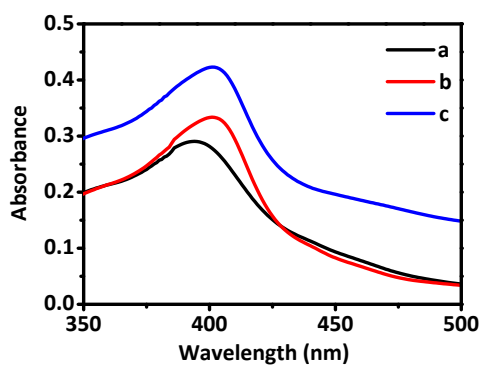

**Figure S3.** UV-vis spectra of the hemin at different conditions. (a) 5 μM hemin, (b) 0.5 μM H1 + 0.5 μM H2 + 5 μM hemin, (c) 1 μM initiator + 0.5 μM H1 + 0.5 μM H2 + 5 μM hemin.

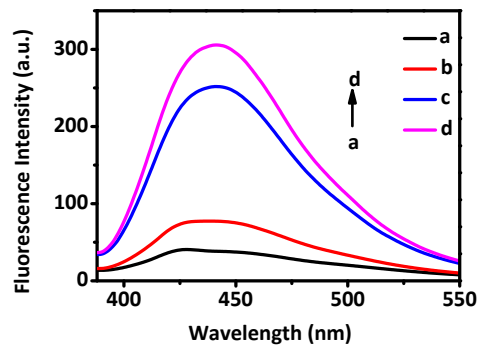

**Figure S4.** Fluorescence spectra of thiamine at different conditions. (a) 5 mM thiamine, (b) 5 mM thiamine + 25 mM  $\text{H}_2\text{O}_2$ , (c) 0.5  $\mu\text{M}$  hemin + 5 mM thiamine + 25 mM  $\text{H}_2\text{O}_2$ , (d) 100 nM initiator + 50 nM H1 + 50 nM H2 + 0.5  $\mu\text{M}$  hemin + 5 mM thiamine + 25 mM  $\text{H}_2\text{O}_2$ .
